# Supplementary material for: Bioinformatics analysis for constructing a cellular senescence-related age-related macular degeneration diagnostic model and identifying relevant disease subtypes to guide treatment
Source: publisher site journal article supplement (doi:10.18632/aging.205804), 2024-05-10
Supplement: Supplementary file [file aging-v16i9-205804-supplementary-material-SD1.pdf]

**SUPPLEMENTARY FIGURES**

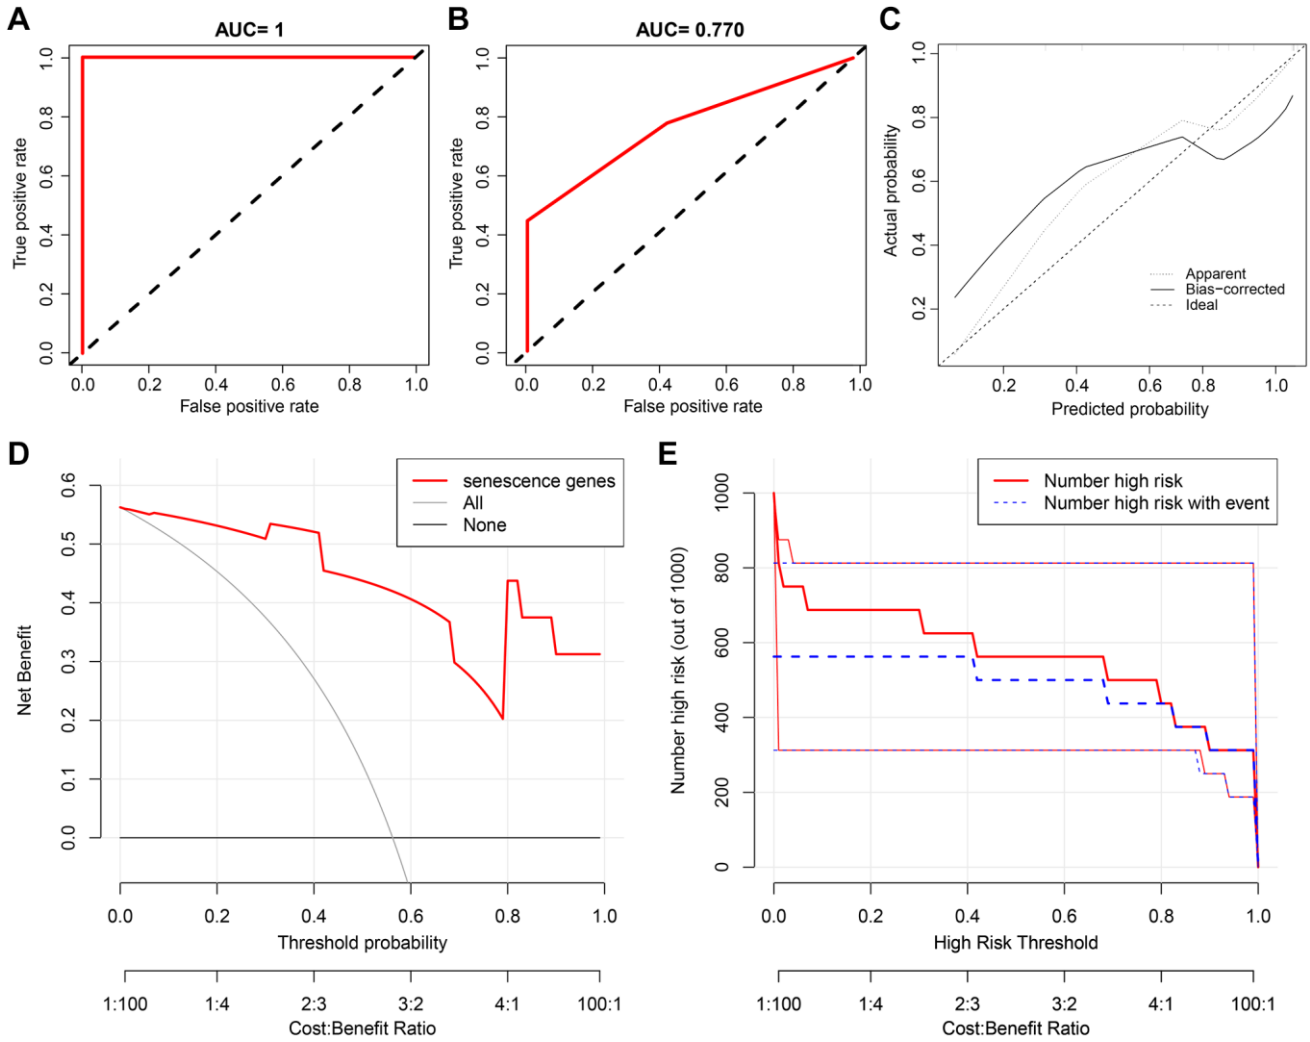

**Supplementary Figure 1. The external validation of the diagnostic model. (A)** The receiver operating characteristic curve (ROC) for the training set, AUC = 1. **(B)** The ROC for the validation set, AUC = 0.770. **(C)** Calibration curve of the validation set. **(D)** Decision curve analysis of the validation set. **(E)** Clinical impact curve of the validation set.

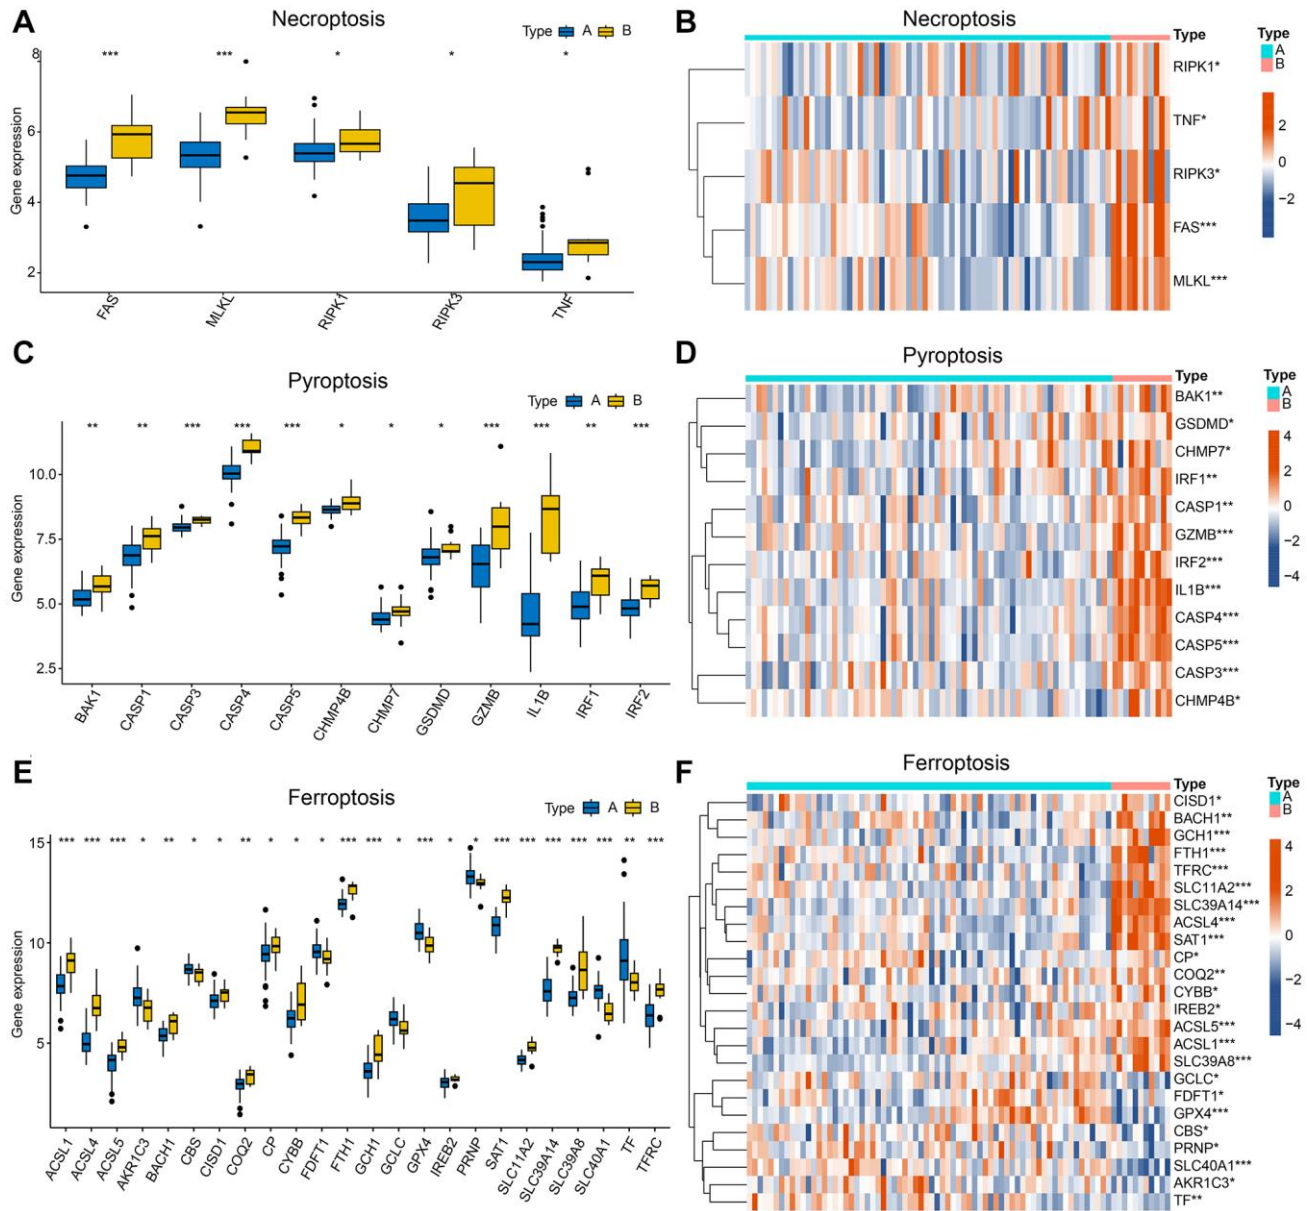

**Supplementary Figure 2. Differential expression of subtypes A and B on multiple programmed death pathways.** (A) Box plot of differential expression of A and B subtypes in Necroptosis. (B) Heatmap of differential expression of A and B subtypes in Necroptosis. (C) Box plot of differential expression of A and B subtypes in Pyroptosis. (D) Heatmap of differential expression of A and B subtypes in Pyroptosis. (E) Box plot of differential expression of A and B subtypes in Ferroptosis. (F) Heatmap of differential expression of A and B subtypes in Ferroptosis. (\* $P < 0.05$ ; \*\* $P < 0.01$ ; \*\*\* $P < 0.001$ ).

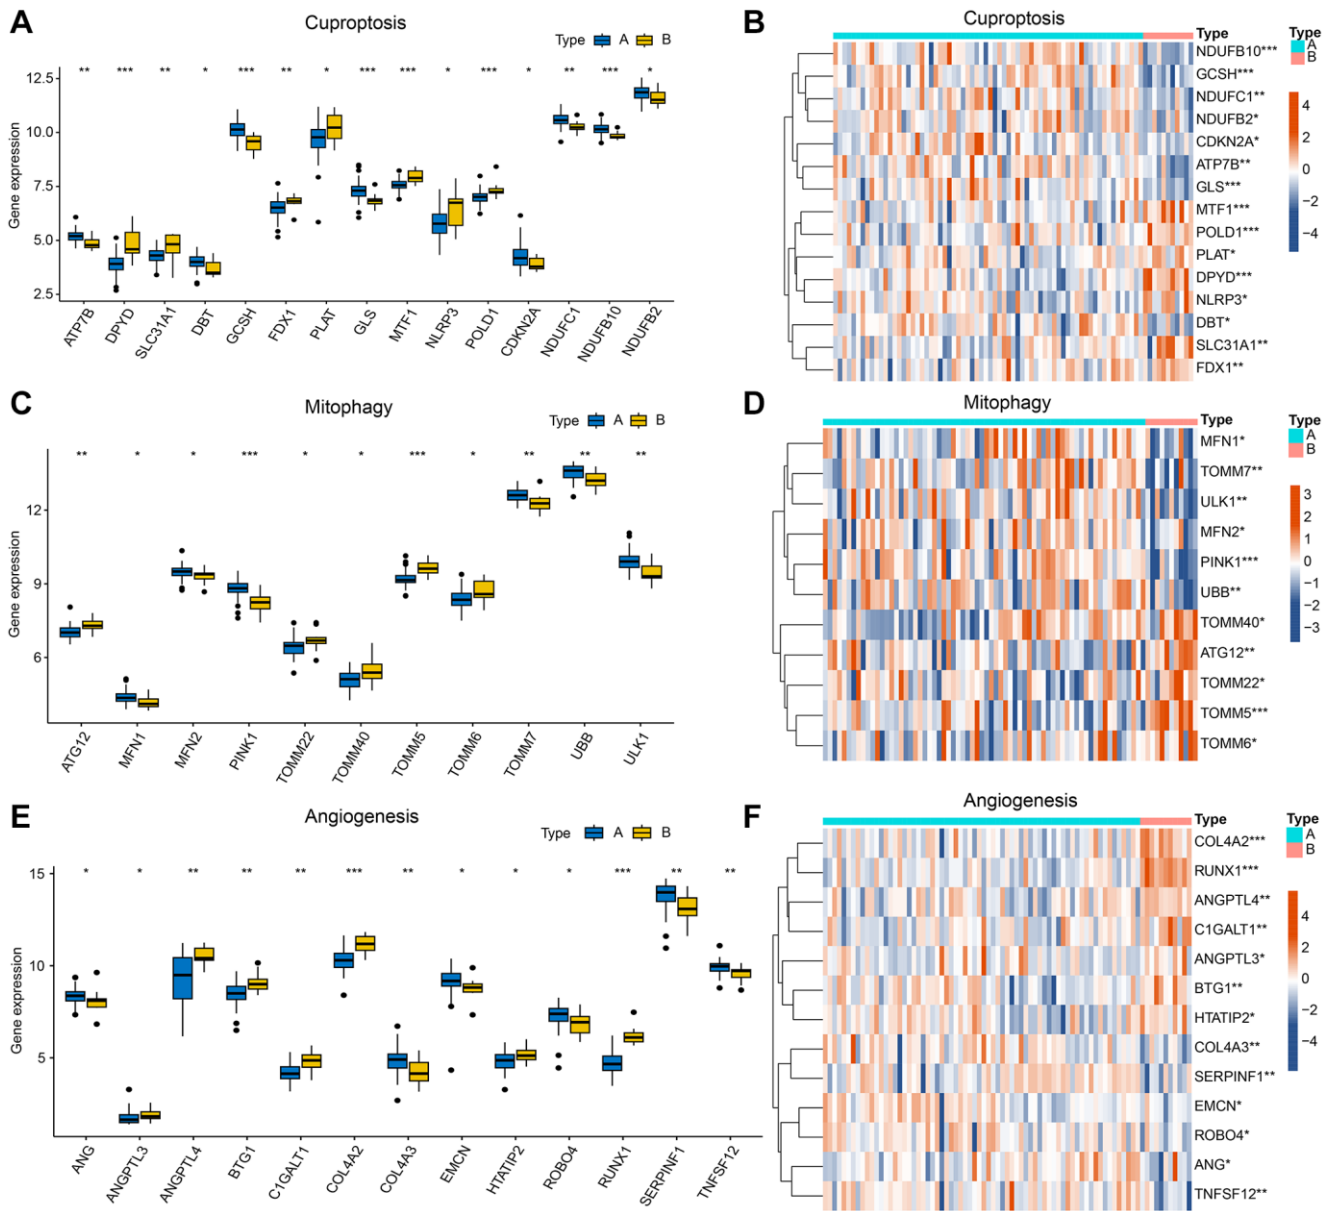

**Supplementary Figure 3. Differential expression of subtypes A and B on multiple programmed death pathways and angiogenesis.** (A) Box plot of differential expression of A and B subtypes in Cuproptosis. (B) Heatmap of differential expression of A and B subtypes in Cuproptosis. (C) Box plot of differential expression of A and B subtypes in Mitophagy. (D) Heatmap of differential expression of A and B subtypes in Mitophagy. (E) Box plot of differential expression of A and B subtypes in Angiogenesis. (F) Heatmap of differential expression of A and B subtypes in Angiogenesis. (\* $P < 0.05$ ; \*\* $P < 0.01$ ; \*\*\* $P < 0.001$ ).
